# Supplementary material for: A thermoresponsive fluorescent rotor based on a hinged naphthalimide for a viscometer and a viscosity-related thermometer
Source: Royal Society of Chemistry journal article supplement (doi:10.1039/c6tc01241h), 2016-01-01
Supplement: c6tc01241h1.pdf [file c6tc01241h1.pdf]

# A Thermoresponsive Fluorescent Rotor Based on Gemel Naphthalimide for a Viscometer and Viscosity-related Thermometer

## Supplementary data

Tengkun Xia, ‡<sup>a</sup> Linlin Wang, ‡<sup>a</sup> Yi Qu,<sup>a\*</sup> Yichuan Rui,<sup>a</sup> Jian Cao<sup>a</sup> Yue Hu,<sup>b</sup> Ji Yang,<sup>c</sup>  
Jianwei Wu and Jingli Xu<sup>a\*</sup>

<sup>a</sup> College of Chemistry and Chemical Engineering, Shanghai University of  
Engineering Science, 333 Longteng Road, Shanghai, 201620, PR China. Fax: 86-21-  
67791214. \*E-mail: (Dr. Yi Qu) [quyi@fudan.edu.cn](mailto:quyi@fudan.edu.cn);

(Prof. Jingli Xu) [xujingli@sues.edu.cn](mailto:xujingli@sues.edu.cn)

<sup>b</sup> Wuhan National Laboratory for Optoelectronics (WNLO), Huazhong University of  
Science and Technology (HUST), 1037 Luoyu Road, Wuhan, Hubei Province,  
430074, P.R. China. \*E-mail: (Dr. Yue Hu) [415626464@qq.com](mailto:415626464@qq.com)

<sup>c</sup> Key Laboratory for Advanced Materials and Institute of Fine Chemicals, East China  
University of Science and Technology, 130 Meilong Road, Shanghai, 200237, China

## Table of Contents

|                                                                                 |    |
|---------------------------------------------------------------------------------|----|
| The polarity-related correlation of BNAP towards different organic solvents.    | S1 |
| Time-resolved decays of BNAP in DCM, ACN, DMF, glycerol and water               | S1 |
| AIE effects of BNAP in mixture of THF/H <sub>2</sub> O and ACN/H <sub>2</sub> O | S2 |
| <sup>1</sup> H NMR spectra of <b>NAP1</b> in CDCl <sub>3</sub>                  | S3 |
| <sup>13</sup> C NMR spectra of <b>NAP1</b> in CDCl <sub>3</sub>                 | S4 |
| MS spectra of <b>NAP1</b>                                                       | S5 |

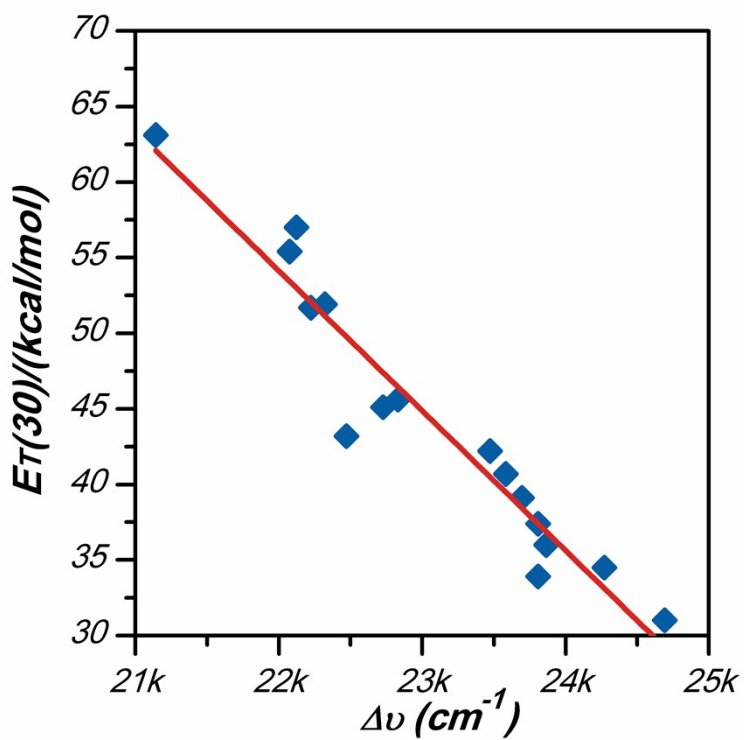

Fig S1 The polarity-related correlation of BNAP towards different organic solvents.

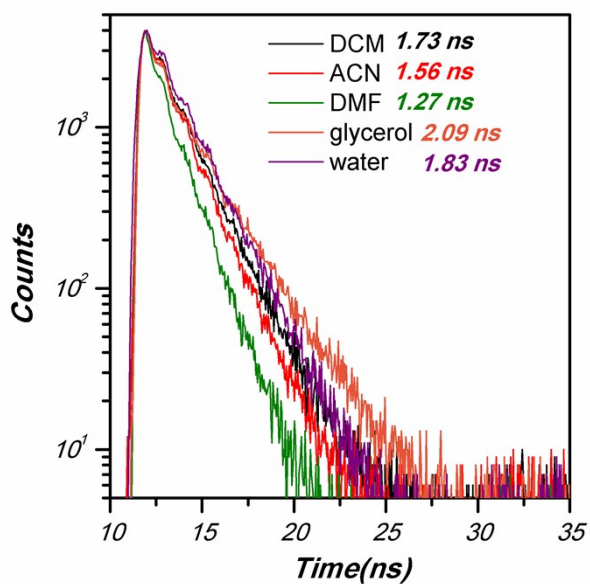

Fig S2 Time-resolved decays of BNAP in DCM, ACN, DMF, glycerol and water

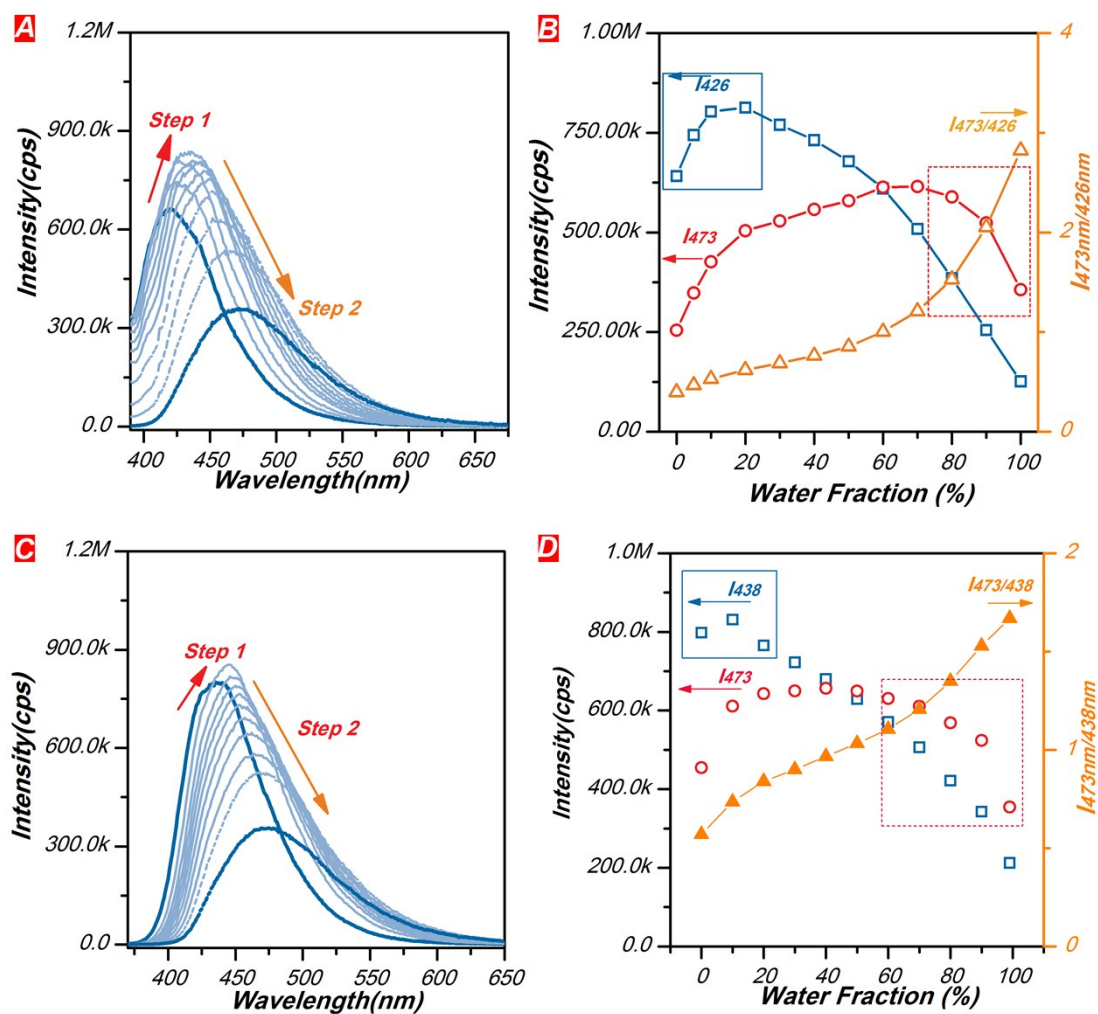

Fig S3. AIE properties. Emission spectra and emission intensity of BNAP upon changing the water content in THF (A,B) and ACN (C,D) solution.

This report was created by ACD/NMR Processor Academic Edition. For more information go to [www.acdlabs.com/nmrproc/](http://www.acdlabs.com/nmrproc/)

NAP1

2016/3/24 12:23:18

| Acquisition Time (sec) | 3.9846               | Comment           | 5 mm PABBO BB-1H/D Z-GRD Z104450/0038 | Date                   | 19 Jun 2015 18:33:36                                       |
|------------------------|----------------------|-------------------|---------------------------------------|------------------------|------------------------------------------------------------|
| Date Stamp             | 19 Jun 2015 18:33:36 |                   |                                       | File Name              | E:\学生原始数据\汪林林\BNAP\20150619-NAP\zs-wl-20150619\1\data\1\1r |
| Frequency (MHz)        | 400.13               | Nucleus           | 1H                                    | Number of Transients   | 16                                                         |
| Original Points Count  | 32768                | Owner             | nmrsu                                 | Points Count           | 32768                                                      |
| Receiver Gain          | 406.00               | SW(cyclical) (Hz) | 8223.68                               | Solvent                | CHLOROFORM-d                                               |
| Spectrum Offset (Hz)   | 2470.9683            | Spectrum Type     | STANDARD                              | Sweep Width (Hz)       | 8223.43                                                    |
|                        |                      |                   |                                       | Temperature (degree C) | 26.760                                                     |

<sup>1</sup>H NMR (400 MHz, CHLOROFORM-d) δ ppm 7.46 - 7.56 (m, 2 H) 7.67 - 7.74 (m, 1 H) 7.80 (d, J=7.78 Hz, 1 H) 7.89 (d, J=7.28 Hz, 1 H) 8.01 (td, J=7.78, 1.76 Hz, 1 H) 8.73 (d, J=6.53 Hz, 1 H) 8.80 (d, J=3.76 Hz, 1 H) 8.84 (d, J=7.53 Hz, 1 H)

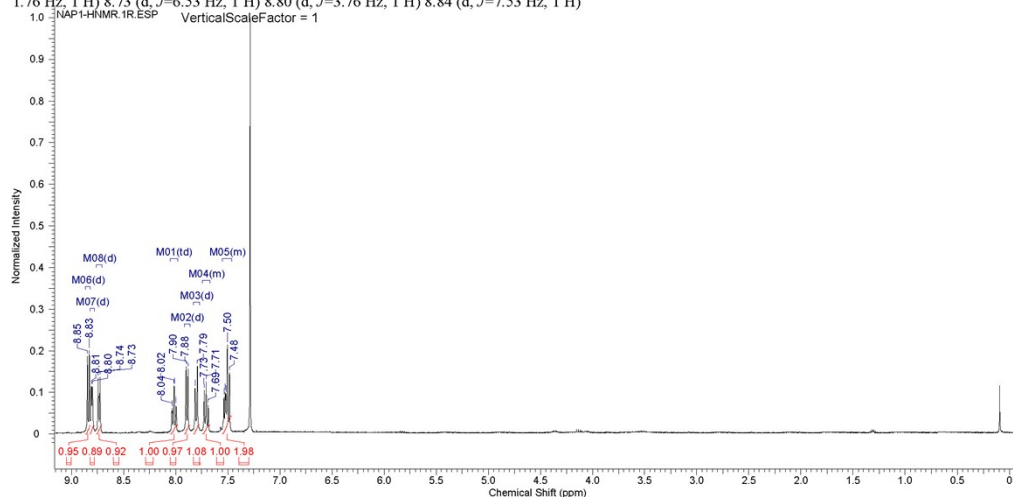

Fig. S4. <sup>1</sup>H NMR spectra of NAP1 in CDCl<sub>3</sub>

This report was created by ACD/NMR Processor Academic Edition. For more information go to [www.acdlabs.com/nmrproc/](http://www.acdlabs.com/nmrproc/)

NAP1

2016/3/24 12:49:53

| Acquisition Time (sec) | 1.3631               | Comment           | 5 mm PABBO BB-1H/D Z-GRD Z104450/0038 | Date                   | 19 Jun 2015 20:28:48                                           |
|------------------------|----------------------|-------------------|---------------------------------------|------------------------|----------------------------------------------------------------|
| Date Stamp             | 19 Jun 2015 20:28:48 |                   |                                       | File Name              | E:\学生原始数据\汪林林\BNAP\20150619-NAP\zs-wl-20150619-c-1\1\data\1\1r |
| Frequency (MHz)        | 100.61               | Nucleus           | 13C                                   | Number of Transients   | 1024                                                           |
| Original Points Count  | 32768                | Owner             | nmrsu                                 | Points Count           | 32768                                                          |
| Receiver Gain          | 912.00               | SW(cyclical) (Hz) | 24038.46                              | Solvent                | CHLOROFORM-d                                                   |
| Spectrum Type          | STANDARD             | Sweep Width (Hz)  | 24037.73                              | Temperature (degree C) | 28.860                                                         |
|                        |                      |                   |                                       | Spectrum Offset (Hz)   | 10060.8047                                                     |

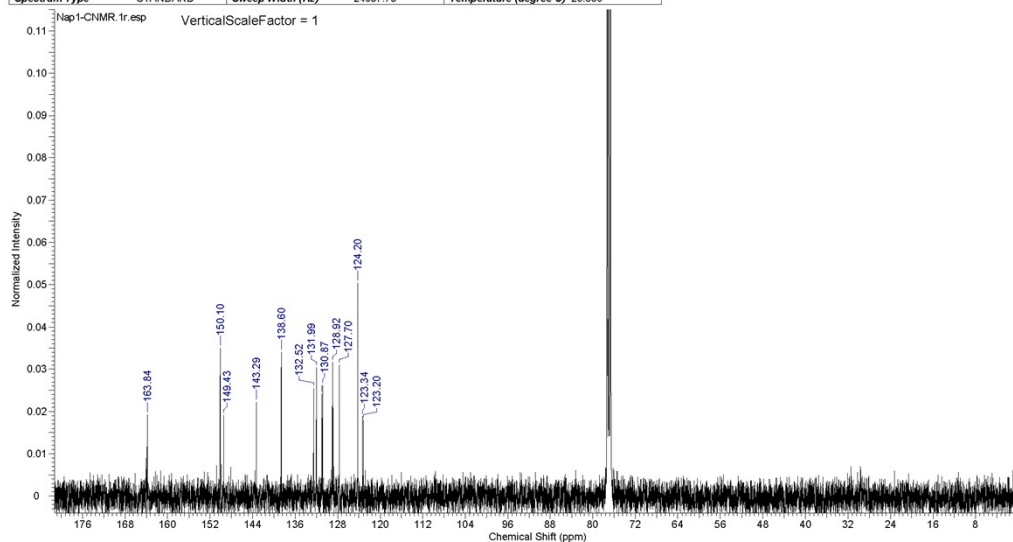

Fig. S5. <sup>13</sup>C NMR spectra of NAP1 in CDCl<sub>3</sub>

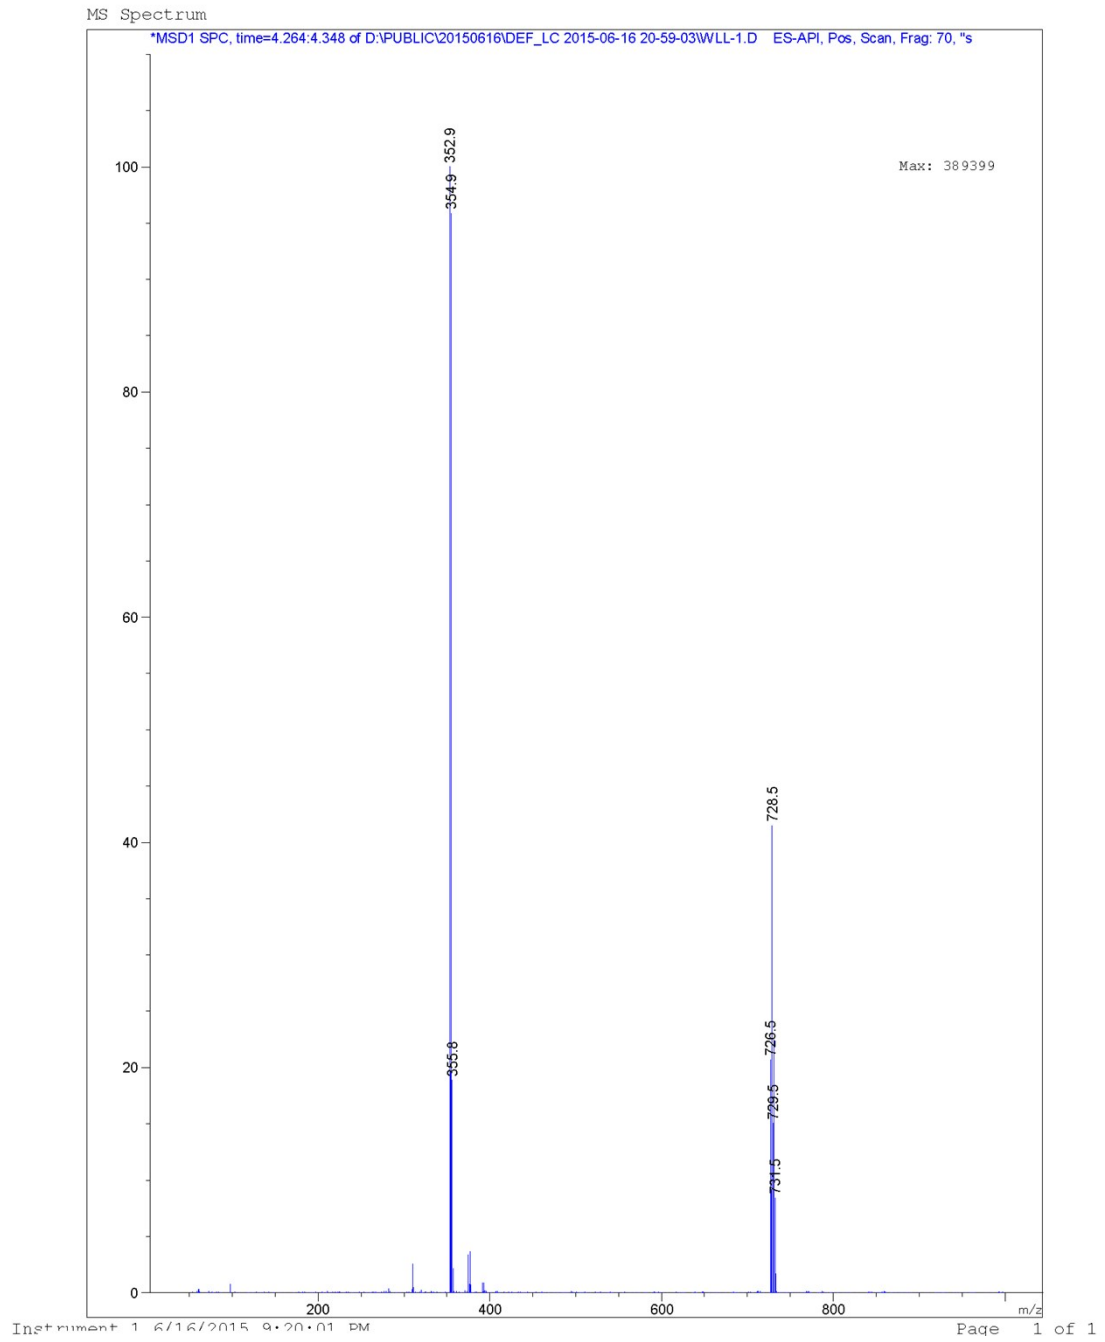

Fig. S6. MS spectra of NAP1

Comment [Y. Qu]: We revised the integration of the NMR peaks.

This report was created by ACD/NMR Processor Academic Edition. For more information go to [www.acdlabs.com/nmrproc/](http://www.acdlabs.com/nmrproc/)  
**BNAP**

| Acquisition Time (sec) | 3.5846               | Comment           | 5 mm PABBO BB-1H/D Z-GRD Z1044500038 | Date                   | 2016/02/24 15:11:37                                             |
|------------------------|----------------------|-------------------|--------------------------------------|------------------------|-----------------------------------------------------------------|
| Date Stamp             | 03 Jul 2015 10:18:40 | File Name         | G:\H1 项目 II                          | File Name              | WNAPIBNAP manuscript_20160319\data\zts-wf-2015070311\pdata\11tr |
| Frequency (MHz)        | 400.13               | Nucleus           | <sup>1</sup> H                       | Number of Transients   | 16                                                              |
| Original Points Count  | 32768                | Owner             | nmrsu                                | Points Count           | 32768                                                           |
| Receiver Gain          | 322.00               | SW(cyclical) (Hz) | 8223.88                              | Solvent                | CHLOROFORM-d                                                    |
| Spectrum Offset (Hz)   | 2470.9883            | Spectrum Type     | STANDARD                             | Sweep Width (Hz)       | 8223.43                                                         |
|                        |                      |                   |                                      | Temperature (degree C) | 26.460                                                          |

<sup>1</sup>H NMR (400 MHz, CHLOROFORM-d) δ ppm 7.47 - 7.55 (m, 4 H) 7.71 (dd, *J*=8.53, 7.53 Hz, 2 H) 7.80 (d, *J*=7.78 Hz, 2 H) 7.89 (d, *J*=7.53 Hz, 2 H) 8.02 (td, *J*=7.65, 1.76 Hz, 2 H) 8.73 (d, *J*=6.27 Hz, 2 H) 8.81 (d, *J*=4.02 Hz, 2 H) 8.84 (d, *J*=7.53 Hz, 2 H)

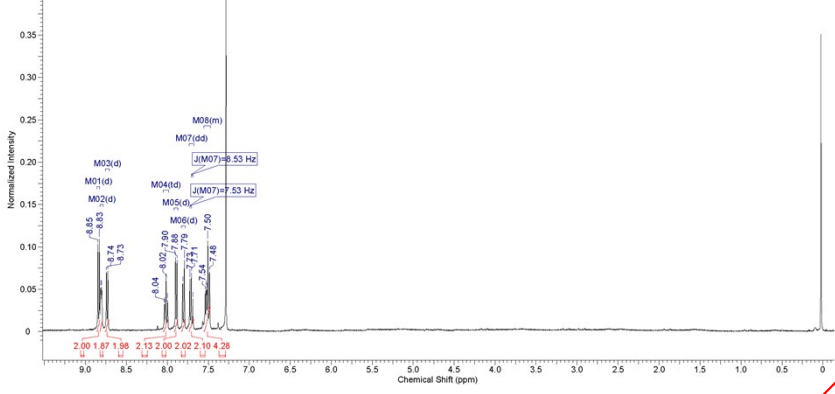

Fig. S7. <sup>1</sup>H NMR of **BNAP** in CDCl<sub>3</sub>

This report was created by ACD/NMR Processor Academic Edition. For more information go to [www.acdlabs.com/nmrproc/](http://www.acdlabs.com/nmrproc/)  
**BNAP**

| Acquisition Time (sec) | 1.3631               | Comment           | 5 mm PABBO BB-1H/D Z-GRD Z1044500038 | Date                   | 2016/02/24 15:24:58                                               |
|------------------------|----------------------|-------------------|--------------------------------------|------------------------|-------------------------------------------------------------------|
| Date Stamp             | 06 Jul 2015 08:14:56 | File Name         | G:\H1 项目 II                          | File Name              | WNAPIBNAP manuscript_20160319\data\zts-wf-20150705-cl1\pdata\11tr |
| Frequency (MHz)        | 100.61               | Nucleus           | <sup>13</sup> C                      | Number of Transients   | 10240                                                             |
| Original Points Count  | 32768                | Owner             | nmrsu                                | Points Count           | 32768                                                             |
| Receiver Gain          | 812.00               | SW(cyclical) (Hz) | 24038.46                             | Solvent                | CHLOROFORM-d                                                      |
| Spectrum Offset (Hz)   | 10060.8047           | Spectrum Type     | STANDARD                             | Sweep Width (Hz)       | 24037.73                                                          |
|                        |                      |                   |                                      | Temperature (degree C) | 29.260                                                            |

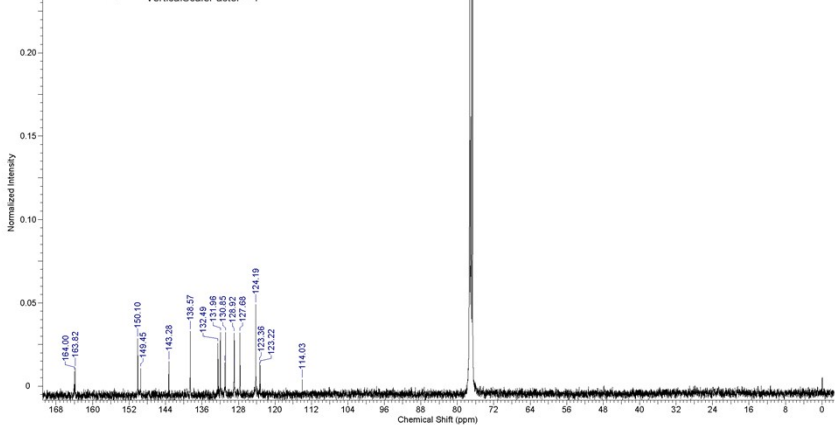

Fig. S8. <sup>13</sup>C NMR of **BNAP** in CDCl<sub>3</sub>

Single Mass Analysis

Tolerance = 50.0 PPM / DBE: min = -1.5, max = 100.0

Element prediction: Off

Number of isotope peaks used for i-FIT = 3

Monoisotopic Mass, Even Electron Ions

1136 formula(e) evaluated with 51 results within limits (up to 1 closest results for each mass)

Elements Used:

C: 0-43 H: 0-100 N: 1-5 O: 0-20 Na: 0-1

HUA-JL

ECUST institute of Fine Chem

08-Mar-2016

HL-YJ-001 20 (0.692) Cm (9:24)

15:49:30

1: TOF MS ES+  
2.10e+003

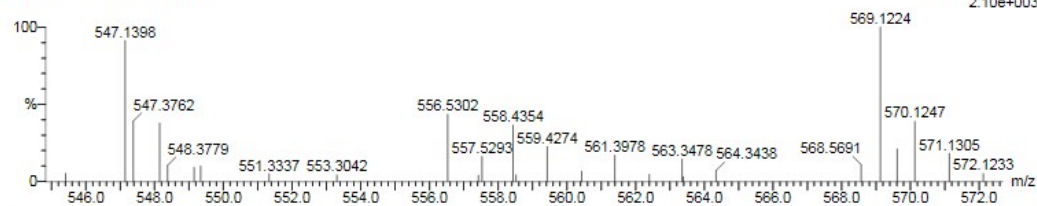

Minimum:

Maximum: 300.0 50.0 -1.5

100.0

| Mass     | Calc. Mass | mDa  | PPM  | DBE  | i-FIT | i-FIT (Norm) | Formula          |
|----------|------------|------|------|------|-------|--------------|------------------|
| 569.1224 | 569.1226   | -0.2 | -0.4 | 27.5 | 26.5  | 0.0          | C34 H18 N4 O4 Na |

Fig. S9. MS spectra of **BNAP**
